# Supplementary material for: A method for the further assembly of targeted unigenes in a transcriptome after assembly by Trinity
Source: Front Plant Sci. 2015 Oct 14;6:843. doi: 10.3389/fpls.2015.00843 (PMC4604318; doi:10.3389/fpls.2015.00843)
Supplement: Table S1 — Information regarding 27 groups of NRT unigenes. The unigenes were grouped according to the clustering of the expression patterns. The reference location indicated the location of unigene coding protein aligned with the protein database of Arabidopsis thaliana. [file TableS1.XLS]

## Sheet: Sheet1
Group	geneID	200S	CKS	200R	CKR	geneLength	Complete CDS	Reference location	Probable unigene pair (5' end + 3' end)	Nr-ID	Nr-Score	Nr-Evalue	Nr-annotation	Swissprot-ID	Swissprot-Score	Subfamily	Swissprot-Evalue	Swissprot-annotation	COG-Protein-or-Domain	COG-Score	COG-Evalue	COG-ID	COG-Function-Description	KO_id	KEGG-Evalue	KEGG-Score	KEGG-Gene	ko_definition	GO-BiologicalProcess	GO-MolecularFunction	Go-CellularComponent
1	Unigene53952_All	10.7149	13.9931	0.9997	5.0001	1010	No	12-101	Unigene53952_All + Unigene31144_All	gi|115446921|ref|NP_001047240.1|	164	2e-39	Os02g0580900 [Oryza sativa Japonica Group] >gi|113536771|dbj|BAF09154.1| Os02g0580900 [Oryza sativa Japonica Group]	sp|Q9LVE0|PTR33_ARATH	155	NRT1/PTR	6e-37	Nitrate transporter 1.3 OS=Arabidopsis thaliana GN=NRT1.3 PE=1 SV=1	--	--	--	--	--	K03305	1e-18	91.7	ppp:PHYPADRAFT_189464	proton-dependent oligopeptide transporter, POT family	GO:0015833//peptide transport	GO:0003824//catalytic activity	GO:0044464//cell part
	Unigene34563_All	3.7886	3.6994	1.0251	3.2813	591	No	175-313		gi|149900509|gb|ABR32185.1|	233	1e-60	peptide transporter [Hakea actites]	sp|Q0WP01|PTR9_ARATH	216	NRT1/PTR	1e-55	Probable peptide/nitrate transporter At1g22540 OS=Arabidopsis thaliana GN=At1g22540 PE=2 SV=1	--	--	--	--	--	K03305	2e-40	162	zma:100280282	proton-dependent oligopeptide transporter, POT family	GO:0006810//transport	-	GO:0016020//membrane
	Unigene31144_All	13.3684	20.9598	1.2631	7.3701	1343	No	208-3'		gi|18409391|ref|NP_564979.1|	432	1e-120	nitrate transporter 1.7 [Arabidopsis thaliana] >gi|75158815|sp|Q8RX77.1|PTR21_ARATH RecName: Full=Nitrate transporter 1.7 >gi|19699104|gb|AAL90918.1| At1g69870/T17F3_10 [Arabidopsis thaliana] >gi|21928025|gb|AAM78041.1| At1g69870/T17F3_10 [Arabidopsis thaliana] >gi|332196872|gb|AEE34993.1| nitrate transporter 1.7 [Arabidopsis thaliana]	sp|Q8RX77|PTR21_ARATH	432	NRT1/PTR	4e-120	Nitrate transporter 1.7 OS=Arabidopsis thaliana GN=NRT1.7 PE=1 SV=1	YKR093w	60.1	9e-09	COG3104	Dipeptide/tripeptide permease	K03305	2e-76	283	pop:POPTR_752070	proton-dependent oligopeptide transporter, POT family	-	-	-
2	Unigene53953_All	20.985	26.2439	7.2805	12.4339	2047	Yes	5'-----3'	Unigene67667_All + Unigene54470_All	gi|294829237|gb|ADF43023.1|	749	0	nitrate transporter NRT1.1 [Medicago truncatula]	sp|Q9LVE0|PTR33_ARATH	734	NRT1/PTR	0	Nitrate transporter 1.3 OS=Arabidopsis thaliana GN=NRT1.3 PE=1 SV=1	ECU11g1050	129	3e-29	COG3104	Dipeptide/tripeptide permease	K03305	3e-122	436	ppp:PHYPADRAFT_189464	proton-dependent oligopeptide transporter, POT family	GO:0044238//primary metabolic process;GO:0015833//peptide transport	GO:0016798//hydrolase activity, acting on glycosyl bonds	GO:0044464//cell part
	Unigene67667_All	29.5692	44.3633	6.8314	10.6133	1614	No	5'-177		gi|297790446|ref|XP_002863114.1|	197	3e-49	proton-dependent oligopeptide transport family protein [Arabidopsis lyrata subsp. lyrata] >gi|297308936|gb|EFH39373.1| proton-dependent oligopeptide transport family protein [Arabidopsis lyrata subsp. lyrata]	sp|Q8RX77|PTR21_ARATH	192	NRT1/PTR	8e-48	Nitrate transporter 1.7 OS=Arabidopsis thaliana GN=NRT1.7 PE=1 SV=1	CAC0751	54.7	5e-07	COG3104	Dipeptide/tripeptide permease	K03305	4e-31	133	sbi:SORBI_01g009890	proton-dependent oligopeptide transporter, POT family	GO:0048856//anatomical structure development;GO:0015833//peptide transport;GO:0015706//nitrate transport;GO:0003006//reproductive developmental process;GO:0009791//post-embryonic development;GO:0031669//cellular response to nutrient levels	GO:0015112//nitrate transmembrane transporter activity	GO:0016020//membrane
	Unigene54470_All	10.2778	11.0057	4.0486	5.2771	1646	No	359-3'		gi|92893694|gb|ABE91872.1|	310	4e-83	TGF-beta receptor, type I/II extracellular region; ABC transporter related [Medicago truncatula]	sp|Q56XQ6|PTR15_ARATH	292	NRT1/PTR	6e-78	Probable peptide/nitrate transporter At1g33440 OS=Arabidopsis thaliana GN=At1g33440 PE=2 SV=1	YKR093w	57.4	7e-08	COG3104	Dipeptide/tripeptide permease	K03305	4e-39	160	pop:POPTR_752070	proton-dependent oligopeptide transporter, POT family	GO:0051707//response to other organism;GO:0015833//peptide transport	GO:0004871//signal transducer activity	GO:0031224//intrinsic to membrane
3	Unigene67511_All	36.1535	52.3611	142.313	478.97	2811	Yes	5'-----3'		gi|48675345|dbj|BAD22820.1|	897	0	nitrate transporter [Prunus persica]	sp|Q05085|PTR7_ARATH	753	NRT1/PTR	0	Nitrate transporter 1.1 OS=Arabidopsis thaliana GN=NRT1.1 PE=1 SV=1	ECU11g1050	129	2e-29	COG3104	Dipeptide/tripeptide permease	K03305	3e-151	533	ppp:PHYPADRAFT_189464	proton-dependent oligopeptide transporter, POT family	GO:0015833//peptide transport	-	GO:0031224//intrinsic to membrane
	Unigene88708_All	16.6695	17.6083	29.0628	100.728	592	No	5'-156		gi|48675345|dbj|BAD22820.1|	231	5e-60	nitrate transporter [Prunus persica]	sp|Q05085|PTR7_ARATH	207	NRT1/PTR	5e-53	Nitrate transporter 1.1 OS=Arabidopsis thaliana GN=NRT1.1 PE=1 SV=1	ECU11g1050	48.5	8e-06	COG3104	Dipeptide/tripeptide permease	K03305	1e-31	133	ppp:PHYPADRAFT_189464	proton-dependent oligopeptide transporter, POT family	GO:0015698//inorganic anion transport;GO:0015833//peptide transport;GO:0010035//response to inorganic substance;GO:0006950//response to stress	GO:0005488//binding;GO:0015103//inorganic anion transmembrane transporter activity	GO:0031224//intrinsic to membrane
4	Unigene15559_All	21.2826	18.3343	29.4589	23.2107	2221	Yes	5'-----3'	Unigene68619_All + Unigene91547_All	gi|75311782|sp|Q9M1I2.1|PTR46_ARATH	575	1e-163	RecName: Full=Probable peptide/nitrate transporter At3g54450 >gi|7258348|emb|CAB77565.1| oligopeptide transporter-like protein [Arabidopsis thaliana]	sp|Q9M1I2|PTR46_ARATH	575	NRT1/PTR	5e-163	Probable peptide/nitrate transporter At3g54450 OS=Arabidopsis thaliana GN=At3g54450 PE=2 SV=1	ECU11g1050	119	2e-26	COG3104	Dipeptide/tripeptide permease	K03305	1e-117	421	zma:100280282	proton-dependent oligopeptide transporter, POT family	-	-	-
	Unigene68619_All	7.2915	5.8409	9.0634	6.2032	762	No	5'-170		gi|12325224|gb|AAG52554.1|AC010675_2	240	1e-62	nitrate transporter (NTL1); 53025-56402 [Arabidopsis thaliana]	sp|Q8H157|PTR19_ARATH	239	NRT1/PTR	1e-62	Nitrate transporter 1.2 OS=Arabidopsis thaliana GN=NRT1.2 PE=1 SV=1	--	--	--	--	--	K03305	1e-28	124	sbi:SORBI_01g009890	proton-dependent oligopeptide transporter, POT family	-	-	-
	Unigene14283_All	9.4842	7.0166	9.801	5.9795	2081	No	5'-267		gi|297845276|ref|XP_002890519.1|	305	2e-81	proton-dependent oligopeptide transport family protein [Arabidopsis lyrata subsp. lyrata] >gi|297336361|gb|EFH66778.1| proton-dependent oligopeptide transport family protein [Arabidopsis lyrata subsp. lyrata]	sp|Q0WP01|PTR9_ARATH	294	NRT1/PTR	2e-78	Probable peptide/nitrate transporter At1g22540 OS=Arabidopsis thaliana GN=At1g22540 PE=2 SV=1	ECU11g1050	92.4	3e-18	COG3104	Dipeptide/tripeptide permease	K03305	8e-57	219	zma:100280282	proton-dependent oligopeptide transporter, POT family	GO:0015833//peptide transport	-	GO:0016020//membrane
	Unigene91547_All	5.2071	3.4502	6.3869	3.5703	215	No	164-234		gi|115468676|ref|NP_001057937.1|	115	2e-25	Os06g0581000 [Oryza sativa Japonica Group] >gi|113595977|dbj|BAF19851.1| Os06g0581000 [Oryza sativa Japonica Group]	sp|Q8VYE4|PTR12_ARATH	113	NRT1/PTR	3e-25	Probable peptide/nitrate transporter At1g27040 OS=Arabidopsis thaliana GN=At1g27040 PE=2 SV=1	--	--	--	--	--	K03305	4e-13	70.5	sbi:SORBI_01g009890	proton-dependent oligopeptide transporter, POT family	GO:0015833//peptide transport	-	GO:0044464//cell part
5	Unigene60049_All	49.0025	60.9741	294.953	105.757	429	No	5-145	Unigene60049_All + Unigene54473_All	gi|75305727|sp|Q93VV5.1|PTR16_ARATH	228	2e-59	RecName: Full=Probable peptide/nitrate transporter At1g59740	sp|Q93VV5|PTR16_ARATH	228	NRT1/PTR	9e-60	Probable peptide/nitrate transporter At1g59740 OS=Arabidopsis thaliana GN=At1g59740 PE=2 SV=1	STM0710	48.5	4e-06	COG3104	Dipeptide/tripeptide permease	K03305	1e-19	92.4	ppp:PHYPADRAFT_189464	proton-dependent oligopeptide transporter, POT family	GO:0051707//response to other organism;GO:0015833//peptide transport	-	GO:0031224//intrinsic to membrane
	Unigene49335_All	50.0348	44.0081	292.49	84.7267	566	No	395-421		gi|92893694|gb|ABE91872.1|	118	5e-26	TGF-beta receptor, type I/II extracellular region; ABC transporter related [Medicago truncatula]	sp|Q56XQ6|PTR15_ARATH	109	NRT1/PTR	1e-23	Probable peptide/nitrate transporter At1g33440 OS=Arabidopsis thaliana GN=At1g33440 PE=2 SV=1	--	--	--	--	--	K03305	1e-10	63.5	ppp:PHYPADRAFT_189464	proton-dependent oligopeptide transporter, POT family	GO:0015833//peptide transport	GO:0004871//signal transducer activity	GO:0031224//intrinsic to membrane
	Unigene54473_All	48.9721	58.9506	310.406	100.969	1861	Yes	136-3'		gi|5080808|gb|AAD39317.1|AC007258_6	595	1e-169	Similar to nitrate and oligopeptide transporters [Arabidopsis thaliana]	sp|Q93VV5|PTR16_ARATH	595	NRT1/PTR	3e-169	Probable peptide/nitrate transporter At1g59740 OS=Arabidopsis thaliana GN=At1g59740 PE=2 SV=1	ECU11g1050	92.8	2e-18	COG3104	Dipeptide/tripeptide permease	K03305	3e-82	303	ppp:PHYPADRAFT_189464	proton-dependent oligopeptide transporter, POT family	GO:0015833//peptide transport	-	GO:0044464//cell part
6	Unigene31738_All	147.556	189.618	1.5169	2.4183	852	No	5'-212	Unigene31738_All + Unigene31143_All	gi|30683214|ref|NP_850084.1|	334	8e-91	nitrate transporter 1.4 [Arabidopsis thaliana] >gi|75314150|sp|Q9SZY4.1|PTR27_ARATH RecName: Full=Nitrate transporter 1.4 >gi|4490321|emb|CAB38705.1| nitrate transporter [Arabidopsis thaliana] >gi|330252781|gb|AEC07875.1| nitrate transporter 1.4 [Arabidopsis thaliana]	sp|Q9SZY4|PTR27_ARATH	334	NRT1/PTR	4e-91	Nitrate transporter 1.4 OS=Arabidopsis thaliana GN=NRT1.4 PE=1 SV=1	ECU11g1050	77.4	3e-14	COG3104	Dipeptide/tripeptide permease	K03305	2e-55	213	ppp:PHYPADRAFT_189464	proton-dependent oligopeptide transporter, POT family	-	-	-
	Unigene31143_All	25.6216	34.079	0.7122	1.9295	1361	No	203-3'		gi|18409391|ref|NP_564979.1|	435	1e-121	nitrate transporter 1.7 [Arabidopsis thaliana] >gi|75158815|sp|Q8RX77.1|PTR21_ARATH RecName: Full=Nitrate transporter 1.7 >gi|19699104|gb|AAL90918.1| At1g69870/T17F3_10 [Arabidopsis thaliana] >gi|21928025|gb|AAM78041.1| At1g69870/T17F3_10 [Arabidopsis thaliana] >gi|332196872|gb|AEE34993.1| nitrate transporter 1.7 [Arabidopsis thaliana]	sp|Q8RX77|PTR21_ARATH	435	NRT1/PTR	4e-121	Nitrate transporter 1.7 OS=Arabidopsis thaliana GN=NRT1.7 PE=1 SV=1	SPBC13A2.04c	58.9	2e-08	COG3104	Dipeptide/tripeptide permease	K03305	4e-77	286	pop:POPTR_752070	proton-dependent oligopeptide transporter, POT family	-	-	-
7	Unigene1032_All	3.6019	3.4704	28.0675	9.6308	1980	Yes	5'-----3'		gi|310947295|sp|P0CI03.1|PTR28_ARATH	451	1e-177	RecName: Full=Putative peptide/nitrate transporter At2g37900	sp|Q9M331|PTR45_ARATH	441	NRT1/PTR	2e-171	Probable peptide/nitrate transporter At3g53960 OS=Arabidopsis thaliana GN=At3g53960 PE=2 SV=2	STM0710	55.5	3e-07	COG3104	Dipeptide/tripeptide permease	K03305	8e-124	338	rcu:RCOM_0776160	proton-dependent oligopeptide transporter, POT family	GO:0006810//transport	-	GO:0016020//membrane
	Unigene1030_All	5.1703	9.4502	187.62	57.1928	409	No	313-445		gi|7630016|emb|CAB88358.1|	137	4e-32	transporter-like protein [Arabidopsis thaliana]	sp|Q9M331|PTR45_ARATH	137	NRT1/PTR	2e-32	Probable peptide/nitrate transporter At3g53960 OS=Arabidopsis thaliana GN=At3g53960 PE=2 SV=2	--	--	--	--	--	K03305	4e-25	110	zma:100280282	proton-dependent oligopeptide transporter, POT family	GO:0010468//regulation of gene expression;GO:0015833//peptide transport	GO:0003677//DNA binding	GO:0016020//membrane
8	Unigene70630_All	2.7595	1.8897	1.885	5.7615	1157	No	204-3'		gi|42565446|ref|NP_189965.2|	284	1e-75	zinc induced facilitator-like 2 protein [Arabidopsis thaliana] >gi|133778902|gb|ABO38791.1| At3g43790 [Arabidopsis thaliana] >gi|332644307|gb|AEE77828.1| zinc induced facilitator-like 2 protein [Arabidopsis thaliana]	sp|Q3EAQ5|PTR36_ARATH	278	NRT1/PTR	7e-74	Probable peptide/nitrate transporter At3g43790 OS=Arabidopsis thaliana GN=ZIFL2 PE=2 SV=2	--	--	--	--	--	--	--	--	--	--	GO:0006810//transport;GO:0051707//response to other organism	GO:0022891//substrate-specific transmembrane transporter activity	GO:0044464//cell part
	Unigene72883_All	3.1674	1.9882	1.4958	3.0861	432	No	502-3'		gi|195615500|gb|ACG29580.1|	104	3e-22	POT family protein [Zea mays]	sp|Q0WP01|PTR9_ARATH	93.2	NRT1/PTR	5e-19	Probable peptide/nitrate transporter At1g22540 OS=Arabidopsis thaliana GN=At1g22540 PE=2 SV=1	--	--	--	--	--	K03305	3e-13	71.2	rcu:RCOM_0776160	proton-dependent oligopeptide transporter, POT family	GO:0015833//peptide transport	-	GO:0031224//intrinsic to membrane
	Unigene70629_All	3.4259	1.8975	0.9324	6.2343	823	No	304-3'		gi|42565446|ref|NP_189965.2|	191	1e-47	zinc induced facilitator-like 2 protein [Arabidopsis thaliana] >gi|133778902|gb|ABO38791.1| At3g43790 [Arabidopsis thaliana] >gi|332644307|gb|AEE77828.1| zinc induced facilitator-like 2 protein [Arabidopsis thaliana]	sp|Q3EAQ5|PTR36_ARATH	184	NRT1/PTR	5e-46	Probable peptide/nitrate transporter At3g43790 OS=Arabidopsis thaliana GN=ZIFL2 PE=2 SV=2	--	--	--	--	--	--	--	--	--	--	GO:0006810//transport;GO:0051707//response to other organism	GO:0022891//substrate-specific transmembrane transporter activity	GO:0044464//cell part
9	Unigene70715_All	1.8648	2.1949	2.7531	0.7949	1423	No	5'-246		gi|110741844|dbj|BAE98864.1|	254	2e-66	oligopeptide transporter - like protein [Arabidopsis thaliana]	sp|Q9LFR1|PTR50_ARATH	254	NRT1/PTR	1e-66	Probable peptide/nitrate transporter At5g14940 OS=Arabidopsis thaliana GN=At5g14940 PE=2 SV=1	ECU11g1050	70.5	7e-12	COG3104	Dipeptide/tripeptide permease	K03305	4e-36	150	rcu:RCOM_0776160	proton-dependent oligopeptide transporter, POT family	GO:0015833//peptide transport;GO:0051707//response to other organism	GO:0005275//amine transmembrane transporter activity	GO:0031410//cytoplasmic vesicle
	Unigene72576_All	2.2238	3.3773	1.8866	0.9087	578	No	5'-169		gi|297845276|ref|XP_002890519.1|	203	1e-51	proton-dependent oligopeptide transport family protein [Arabidopsis lyrata subsp. lyrata] >gi|297336361|gb|EFH66778.1| proton-dependent oligopeptide transport family protein [Arabidopsis lyrata subsp. lyrata]	sp|Q0WP01|PTR9_ARATH	199	NRT1/PTR	1e-50	Probable peptide/nitrate transporter At1g22540 OS=Arabidopsis thaliana GN=At1g22540 PE=2 SV=1	ECU11g1050	68.2	9e-12	COG3104	Dipeptide/tripeptide permease	K03305	4e-33	138	sbi:SORBI_01g009890	proton-dependent oligopeptide transporter, POT family	GO:0015833//peptide transport	-	GO:0016020//membrane
	Unigene30867_All	0.5203	0.4392	61.9536	57.5676	2311	Yes	5'-----3'	Unigene49607_All + Unigene30293_All	gi|297851686|ref|XP_002893724.1|	692	0	proton-dependent oligopeptide transport family protein [Arabidopsis lyrata subsp. lyrata] >gi|297339566|gb|EFH69983.1| proton-dependent oligopeptide transport family protein [Arabidopsis lyrata subsp. lyrata]	sp|Q9LQL2|PTR14_ARATH	690	NRT1/PTR	0	Nitrate transporter 1.5 OS=Arabidopsis thaliana GN=NRT1.5 PE=1 SV=2	ECU11g1050	137	8e-32	COG3104	Dipeptide/tripeptide permease	K03305	2e-126	451	zma:100280282	proton-dependent oligopeptide transporter, POT family	-	-	-
10	Unigene49607_All	1.8478	0.7655	87.3269	52.715	561	No	59-245		gi|297851686|ref|XP_002893724.1|	273	1e-72	proton-dependent oligopeptide transport family protein [Arabidopsis lyrata subsp. lyrata] >gi|297339566|gb|EFH69983.1| proton-dependent oligopeptide transport family protein [Arabidopsis lyrata subsp. lyrata]	sp|Q9LQL2|PTR14_ARATH	273	NRT1/PTR	7e-73	Nitrate transporter 1.5 OS=Arabidopsis thaliana GN=NRT1.5 PE=1 SV=2	ECU11g1050	78.2	8e-15	COG3104	Dipeptide/tripeptide permease	K03305	3e-38	155	rcu:RCOM_0776160	proton-dependent oligopeptide transporter, POT family	-	-	-
	Unigene63472_All	0	0.338	53.8504	36.5528	231	No	261-337		gi|115448297|ref|NP_001047928.1|	77.4	5e-14	Os02g0716800 [Oryza sativa Japonica Group] >gi|42408043|dbj|BAD09179.1| peptide transporter-like [Oryza sativa Japonica Group] >gi|45735856|dbj|BAD12890.1| peptide transporter-like [Oryza sativa Japonica Group] >gi|113537459|dbj|BAF09842.1| Os02g0716800 [Oryza sativa Japonica Group]	sp|Q93Z20|PTR17_ARATH	68.2	NRT1/PTR	2e-11	Probable peptide/nitrate transporter At1g62200 OS=Arabidopsis thaliana GN=At1g62200 PE=2 SV=1	--	--	--	--	--	K03305	2e-10	61.2	sbi:SORBI_01g009890	proton-dependent oligopeptide transporter, POT family	GO:0006810//transport	-	GO:0044464//cell part
	Unigene30293_All	0.8223	1.5486	121.416	72.7461	958	No	311-3'		gi|87240677|gb|ABD32535.1|	346	2e-94	TGF-beta receptor, type I/II extracellular region [Medicago truncatula]	sp|Q9LQL2|PTR14_ARATH	332	NRT1/PTR	2e-90	Nitrate transporter 1.5 OS=Arabidopsis thaliana GN=NRT1.5 PE=1 SV=2	ECU11g1050	72.4	1e-12	COG3104	Dipeptide/tripeptide permease	K03305	3e-62	236	rcu:RCOM_0776160	proton-dependent oligopeptide transporter, POT family	GO:0015833//peptide transport	-	GO:0044464//cell part
11	Unigene48381_All	0.8038	0.883	0.0652	10.5733	619	No	5'-224		gi|48675345|dbj|BAD22820.1|	301	4e-81	nitrate transporter [Prunus persica]	sp|Q05085|PTR7_ARATH	266	NRT1/PTR	6e-71	Nitrate transporter 1.1 OS=Arabidopsis thaliana GN=NRT1.1 PE=1 SV=1	ECU11g1050	82	7e-16	COG3104	Dipeptide/tripeptide permease	K03305	4e-54	208	ppp:PHYPADRAFT_189464	proton-dependent oligopeptide transporter, POT family	-	-	-
	Unigene53949_All	1.2223	1.1509	0.2747	1.8322	441	No	5'-78		gi|224131668|ref|XP_002321148.1|	122	1e-27	nitrate transporter, H+/oligopeptide symporter POT family [Populus trichocarpa] >gi|222861921|gb|EEE99463.1| nitrate transporter, H+/oligopeptide symporter POT family [Populus trichocarpa]	sp|Q9LVE0|PTR33_ARATH	114	NRT1/PTR	2e-25	Nitrate transporter 1.3 OS=Arabidopsis thaliana GN=NRT1.3 PE=1 SV=1	--	--	--	--	--	K03305	8e-13	70.1	ppp:PHYPADRAFT_189464	proton-dependent oligopeptide transporter, POT family	-	-	-
12	Unigene63092_All	1.3697	4.8069	0.2426	146.436	333	No	5'-80	Unigene63092_All + Unigene71213_All	gi|297851686|ref|XP_002893724.1|	102	1e-21	proton-dependent oligopeptide transport family protein [Arabidopsis lyrata subsp. lyrata] >gi|297339566|gb|EFH69983.1| proton-dependent oligopeptide transport family protein [Arabidopsis lyrata subsp. lyrata]	sp|Q9LQL2|PTR14_ARATH	102	NRT1/PTR	1e-21	Nitrate transporter 1.5 OS=Arabidopsis thaliana GN=NRT1.5 PE=1 SV=2	--	--	--	--	--	K03305	9e-12	65.9	pop:POPTR_752070	proton-dependent oligopeptide transporter, POT family	-	-	-
	Unigene71213_All	4.1979	4.8103	0.3857	157.975	2094	No	78-3'	Unigene63092_All + Unigene34485_All	gi|8920621|gb|AAF81343.1|AC007767_23	775	0	Contains similarity to a peptide transport protein homolog F17L22.140 gi|7488004 from Arabidopsis thaliana BAC F17L22 gb|AL035527. It contains a POT family domain PF|00854. ESTs gb|BE038248, gb|T22680, gb|T04498, gb|R89961, gb|R30626, gb|R30389, gb|AA713063 and gb|AA585801 come from this gene	sp|Q9LQL2|PTR14_ARATH	775	NRT1/PTR	0	Nitrate transporter 1.5 OS=Arabidopsis thaliana GN=NRT1.5 PE=1 SV=2	ECU11g1050	128	3e-29	COG3104	Dipeptide/tripeptide permease	K03305	3e-119	427	rcu:RCOM_0776160	proton-dependent oligopeptide transporter, POT family	-	-	-
	Unigene34485_All	2.3528	2.8575	0.7307	31.4964	1216	No	218-3'		gi|48675345|dbj|BAD22820.1|	509	1e-143	nitrate transporter [Prunus persica]	sp|Q05085|PTR7_ARATH	430	NRT1/PTR	1e-119	Nitrate transporter 1.1 OS=Arabidopsis thaliana GN=NRT1.1 PE=1 SV=1	ECU11g1050	72	2e-12	COG3104	Dipeptide/tripeptide permease	K03305	2e-82	303	ppp:PHYPADRAFT_189464	proton-dependent oligopeptide transporter, POT family	-	-	-
13	Unigene85390_All	1.3147	0.4761	1.4776	6.1093	410	No	268-392	Unigene85390_All + Unigene23477_All	gi|195648120|gb|ACG43528.1|	161	3e-39	carbohydrate transporter/ sugar porter/ transporter [Zea mays]	sp|Q3EAQ5|PTR36_ARATH	151	NRT1/PTR	1e-36	Probable peptide/nitrate transporter At3g43790 OS=Arabidopsis thaliana GN=ZIFL2 PE=2 SV=2	--	--	--	--	--	--	--	--	--	--	GO:0015850//organic alcohol transport;GO:0042221//response to chemical stimulus	GO:0008493//tetracycline transporter activity	GO:0031224//intrinsic to membrane
	Unigene23477_All	1.1472	0.6173	0.9578	2.2356	253	No	466-541		gi|296453136|gb|ADH21397.1|	72.4	2e-12	nitrate transporter [Citrus trifoliata]	sp|Q9M9V7|PTR8_ARATH	62.8	NRT1/PTR	6e-10	Probable peptide/nitrate transporter At1g18880 OS=Arabidopsis thaliana GN=At1g18880 PE=2 SV=1	--	--	--	--	--	--	--	--	--	--	-	-	-
14	Unigene45516_All	18.7238	14.7684	0.0529	0.1586	1528	No	5'-408		gi|310947333|sp|Q8VZR7.2|PTR30_ARATH	574	1e-162	RecName: Full=Probable peptide/nitrate transporter At2g40460 >gi|20453068|gb|AAM19779.1| At2g40460/T2P4.19 [Arabidopsis thaliana] >gi|25090213|gb|AAN72253.1| At2g40460/T2P4.19 [Arabidopsis thaliana]	sp|Q8VZR7|PTR30_ARATH	574	NRT1/PTR	7e-163	Probable peptide/nitrate transporter At2g40460 OS=Arabidopsis thaliana GN=At2g40460 PE=2 SV=2	STM0710	93.6	8e-19	COG3104	Dipeptide/tripeptide permease	K03305	2e-92	337	rcu:RCOM_0776160	proton-dependent oligopeptide transporter, POT family	-	-	-
	Unigene21899_All	9.5786	12.3138	0.0426	0.2557	948	No	356-3'		gi|297825869|ref|XP_002880817.1|	310	2e-83	nitrate transporter [Arabidopsis lyrata subsp. lyrata] >gi|297326656|gb|EFH57076.1| nitrate transporter [Arabidopsis lyrata subsp. lyrata]	sp|Q9SZY4|PTR27_ARATH	309	NRT1/PTR	2e-83	Nitrate transporter 1.4 OS=Arabidopsis thaliana GN=NRT1.4 PE=1 SV=1	SPBC13A2.04c	60.1	5e-09	COG3104	Dipeptide/tripeptide permease	K03305	9e-47	184	rcu:RCOM_0776160	proton-dependent oligopeptide transporter, POT family	GO:0006950//response to stress;GO:0015833//peptide transport;GO:0009719//response to endogenous stimulus	-	GO:0031224//intrinsic to membrane
15	Unigene71982_All	6.6129	7.4791	0.2221	0.5555	1091	No	5'-321	Unigene71982_All + Unigene61016_All	gi|297851686|ref|XP_002893724.1|	416	1e-115	proton-dependent oligopeptide transport family protein [Arabidopsis lyrata subsp. lyrata] >gi|297339566|gb|EFH69983.1| proton-dependent oligopeptide transport family protein [Arabidopsis lyrata subsp. lyrata]	sp|Q9LQL2|PTR14_ARATH	410	NRT1/PTR	6e-114	Nitrate transporter 1.5 OS=Arabidopsis thaliana GN=NRT1.5 PE=1 SV=2	ECU11g1050	85.9	1e-16	COG3104	Dipeptide/tripeptide permease	K03305	4e-69	259	zma:100280282	proton-dependent oligopeptide transporter, POT family	-	-	-
	Unigene34465_All	27.3585	30.2189	0.1708	0.415	1655	Yes	5'-430	Unigene34465_All + Unigene61016_All	gi|75335666|sp|Q9LYR6.1|PTR49_ARATH	664	0	RecName: Full=Probable peptide/nitrate transporter At5g13400 >gi|7543907|emb|CAB87147.1| peptide transporter-like protein [Arabidopsis thaliana] >gi|18252225|gb|AAL61945.1| peptide transporter-like protein [Arabidopsis thaliana] >gi|22136152|gb|AAM91154.1| peptide transporter-like protein [Arabidopsis thaliana]	sp|Q9LYR6|PTR49_ARATH	664	NRT1/PTR	0	Probable peptide/nitrate transporter At5g13400 OS=Arabidopsis thaliana GN=At5g13400 PE=2 SV=1	ECU11g1050	95.1	3e-19	COG3104	Dipeptide/tripeptide permease	K03305	9e-93	338	ppp:PHYPADRAFT_128619	proton-dependent oligopeptide transporter, POT family	GO:0015833//peptide transport	-	GO:0031224//intrinsic to membrane
	Unigene61016_All	30.1879	29.3795	0.2906	0.6976	695	No	482-3'		gi|75335666|sp|Q9LYR6.1|PTR49_ARATH	199	4e-50	RecName: Full=Probable peptide/nitrate transporter At5g13400 >gi|7543907|emb|CAB87147.1| peptide transporter-like protein [Arabidopsis thaliana] >gi|18252225|gb|AAL61945.1| peptide transporter-like protein [Arabidopsis thaliana] >gi|22136152|gb|AAM91154.1| peptide transporter-like protein [Arabidopsis thaliana]	sp|Q9LYR6|PTR49_ARATH	199	NRT1/PTR	2e-50	Probable peptide/nitrate transporter At5g13400 OS=Arabidopsis thaliana GN=At5g13400 PE=2 SV=1	--	--	--	--	--	K03305	2e-24	110	rcu:RCOM_0776160	proton-dependent oligopeptide transporter, POT family	GO:0006857//oligopeptide transport;GO:0000904//cell morphogenesis involved in differentiation;GO:0008152//metabolic process	GO:0015198//oligopeptide transporter activity	GO:0031224//intrinsic to membrane
16	Unigene28531_All	4.5049	1.3851	0.1791	0.3583	451	No	5'-59		gi|297799896|ref|XP_002867832.1|	68.9	2e-11	proton-dependent oligopeptide transport family protein [Arabidopsis lyrata subsp. lyrata] >gi|297313668|gb|EFH44091.1| proton-dependent oligopeptide transport family protein [Arabidopsis lyrata subsp. lyrata]	sp|Q8GXN2|PTR47_ARATH	68.9	NRT1/PTR	1e-11	Nitrate transporter 1.8 OS=Arabidopsis thaliana GN=NRT1.8 PE=2 SV=2	--	--	--	--	--	K03305	5e-08	54.3	zma:100280282	proton-dependent oligopeptide transporter, POT family	GO:0015833//peptide transport	GO:0004871//signal transducer activity	GO:0044464//cell part
	Unigene81309_All	2.166	1.4568	0.3014	0.4522	268	No	5'-70		gi|297845276|ref|XP_002890519.1|	79.3	1e-14	proton-dependent oligopeptide transport family protein [Arabidopsis lyrata subsp. lyrata] >gi|297336361|gb|EFH66778.1| proton-dependent oligopeptide transport family protein [Arabidopsis lyrata subsp. lyrata]	sp|Q0WP01|PTR9_ARATH	76.6	NRT1/PTR	4e-14	Probable peptide/nitrate transporter At1g22540 OS=Arabidopsis thaliana GN=At1g22540 PE=2 SV=1	--	--	--	--	--	K03305	1e-08	55.5	rcu:RCOM_0776160	proton-dependent oligopeptide transporter, POT family	GO:0015833//peptide transport	-	GO:0016020//membrane
17	Unigene37810_All	0.3337	0.1571	0.5688	1.138	497	No	312-356		gi|224979415|gb|ACN72639.1|	52	3e-06	nitrate transporter [Malus hupehensis]	sp|Q9LV10|PTR53_ARATH	50.4	NRT1/PTR	5e-06	Probable peptide/nitrate transporter At5g62680 OS=Arabidopsis thaliana GN=At5g62680 PE=2 SV=1	--	--	--	--	--	--	--	--	--	--	-	-	-
	Unigene140170_All	0	0	0.2693	1.4813	300	No	427-521		gi|225435540|ref|XP_002283049.1|	62.8	1e-09	PREDICTED: similar to proton-dependent oligopeptide transport (POT) family protein [Vitis vinifera]	sp|Q9LFR1|PTR50_ARATH	58.5	NRT1/PTR	1e-08	Probable peptide/nitrate transporter At5g14940 OS=Arabidopsis thaliana GN=At5g14940 PE=2 SV=1	--	--	--	--	--	--	--	--	--	--	-	GO:0005215//transporter activity	GO:0044464//cell part
18	Unigene49930_All	0	0.1581	1.4716	0.8996	494	No	41-122	Unigene49930_All + Unigene54471_All	gi|296453136|gb|ADH21397.1|	67	1e-10	nitrate transporter [Citrus trifoliata]	sp|Q944G5|PTR44_ARATH	43.9	NRT1/PTR	3e-09	Probable peptide/nitrate transporter At3g47960 OS=Arabidopsis thaliana GN=At3g47960 PE=1 SV=2	--	--	--	--	--	--	--	--	--	--	-	-	-
	Unigene54471_All	0.3845	0.2715	0.9363	0.4371	1294	No	359-3'		gi|92893694|gb|ABE91872.1|	310	3e-83	TGF-beta receptor, type I/II extracellular region; ABC transporter related [Medicago truncatula]	sp|Q56XQ6|PTR15_ARATH	292	NRT1/PTR	4e-78	Probable peptide/nitrate transporter At1g33440 OS=Arabidopsis thaliana GN=At1g33440 PE=2 SV=1	YKR093w	57.4	5e-08	COG3104	Dipeptide/tripeptide permease	K03305	3e-39	160	pop:POPTR_752070	proton-dependent oligopeptide transporter, POT family	GO:0051707//response to other organism;GO:0015833//peptide transport	GO:0004871//signal transducer activity	GO:0031224//intrinsic to membrane
19	Unigene54452_All	4.5296	3.0124	7.6518	9.1048	1309	No	5'-243	Unigene54452_All + Unigene44258_All	gi|166209891|gb|ABL89187.3|	345	1e-154	high affinity nitrate transporter [Spinacia oleracea]	sp|Q9LPV5|NRT25_ARATH	328	NRT2	1e-140	High affinity nitrate transporter 2.5 OS=Arabidopsis thaliana GN=NRT2.5 PE=2 SV=1	RSp1223	169	7e-64	COG2223	Nitrate/nitrite transporter	K02575	4e-121	271	ppp:PHYPADRAFT_82118	MFS transporter, NNP family, nitrate/nitrite transporter	-	-	-
	Unigene44258_All	3.6081	3.0075	6.3952	6.8006	701	No	423-463		gi|166209891|gb|ABL89187.3|	93.6	2e-18	high affinity nitrate transporter [Spinacia oleracea]	sp|Q9LPV5|NRT25_ARATH	87	NRT2	1e-16	High affinity nitrate transporter 2.5 OS=Arabidopsis thaliana GN=NRT2.5 PE=2 SV=1	--	--	--	--	--	K02575	2e-13	73.2	ppp:PHYPADRAFT_82118	MFS transporter, NNP family, nitrate/nitrite transporter	GO:0006810//transport	-	GO:0016020//membrane
20	Unigene34113_All	46.8171	60.5835	211.187	180.154	821	No	5'-258	Unigene34113_All + Unigene5588_All	gi|166209891|gb|ABL89187.3|	371	1e-102	high affinity nitrate transporter [Spinacia oleracea]	sp|Q9LPV5|NRT25_ARATH	329	NRT2	2e-89	High affinity nitrate transporter 2.5 OS=Arabidopsis thaliana GN=NRT2.5 PE=2 SV=1	RSp1223	167	3e-41	COG2223	Nitrate/nitrite transporter	K02575	5e-76	281	ppp:PHYPADRAFT_82118	MFS transporter, NNP family, nitrate/nitrite transporter	-	-	GO:0016020//membrane
	Unigene61309_All	19.9752	30.4211	77.9012	75.1242	548	No	242-423		gi|166209891|gb|ABL89187.3|	265	2e-70	high affinity nitrate transporter [Spinacia oleracea]	sp|Q9LPV5|NRT25_ARATH	241	NRT2	2e-63	High affinity nitrate transporter 2.5 OS=Arabidopsis thaliana GN=NRT2.5 PE=2 SV=1	RSp1223	115	3e-26	COG2223	Nitrate/nitrite transporter	K02575	6e-58	220	ppp:PHYPADRAFT_82118	MFS transporter, NNP family, nitrate/nitrite transporter	GO:0006810//transport	GO:0005215//transporter activity	GO:0016020//membrane
	Unigene5588_All	28.6416	49.7559	186.584	175.772	747	No	415-3'		gi|166209891|gb|ABL89187.3|	136	3e-31	high affinity nitrate transporter [Spinacia oleracea]	sp|Q9LPV5|NRT25_ARATH	92	NRT2	4e-18	High affinity nitrate transporter 2.5 OS=Arabidopsis thaliana GN=NRT2.5 PE=2 SV=1	--	--	--	--	--	K02575	2e-14	76.6	cre:CHLREDRAFT_192088	MFS transporter, NNP family, nitrate/nitrite transporter	-	-	GO:0016020//membrane
21	Unigene41266_All	170.744	241.048	85.1055	60.2945	2705	No	5'-388		gi|166209891|gb|ABL89187.3|	543	1e-153	high affinity nitrate transporter [Spinacia oleracea]	sp|Q9LPV5|NRT25_ARATH	500	NRT2	2e-140	High affinity nitrate transporter 2.5 OS=Arabidopsis thaliana GN=NRT2.5 PE=2 SV=1	RSp1223	253	9e-67	COG2223	Nitrate/nitrite transporter	K02575	1e-122	438	ppp:PHYPADRAFT_82118	MFS transporter, NNP family, nitrate/nitrite transporter	-	-	-
	Unigene41265_All	72.809	132.206	40.7233	35.6178	963	No	314-3'		gi|166209891|gb|ABL89187.3|	268	8e-71	high affinity nitrate transporter [Spinacia oleracea]	sp|Q9LPV5|NRT25_ARATH	235	NRT2	3e-61	High affinity nitrate transporter 2.5 OS=Arabidopsis thaliana GN=NRT2.5 PE=2 SV=1	RSp1223	70.9	3e-12	COG2223	Nitrate/nitrite transporter	K02575	3e-54	209	ppp:PHYPADRAFT_82118	MFS transporter, NNP family, nitrate/nitrite transporter	GO:0006810//transport	-	GO:0016020//membrane
22	Unigene68983_All	6.518	5.6512	3.1116	2.6724	1285	No	19-388		gi|166209891|gb|ABL89187.3|	541	1e-153	high affinity nitrate transporter [Spinacia oleracea]	sp|Q9LPV5|NRT25_ARATH	518	NRT2	3e-146	High affinity nitrate transporter 2.5 OS=Arabidopsis thaliana GN=NRT2.5 PE=2 SV=1	RSp1223	256	6e-68	COG2223	Nitrate/nitrite transporter	K02575	1e-129	460	ppp:PHYPADRAFT_82118	MFS transporter, NNP family, nitrate/nitrite transporter	-	-	-
	Unigene68982_All	3.3171	3.4208	2.2309	1.1543	525	No	204-388		gi|166209891|gb|ABL89187.3|	225	3e-58	high affinity nitrate transporter [Spinacia oleracea]	sp|Q9LPV5|NRT25_ARATH	202	NRT2	7e-52	High affinity nitrate transporter 2.5 OS=Arabidopsis thaliana GN=NRT2.5 PE=2 SV=1	RSp1223	101	6e-22	COG2223	Nitrate/nitrite transporter	K02575	1e-47	186	ppp:PHYPADRAFT_82118	MFS transporter, NNP family, nitrate/nitrite transporter	-	-	-
23	Unigene54449_All	0.4829	0.5847	9.9793	13.7805	1202	No	48-447		gi|166209891|gb|ABL89187.3|	605	1e-172	high affinity nitrate transporter [Spinacia oleracea]	sp|Q9LPV5|NRT25_ARATH	569	NRT2	1e-161	High affinity nitrate transporter 2.5 OS=Arabidopsis thaliana GN=NRT2.5 PE=2 SV=1	RSp1223	268	1e-71	COG2223	Nitrate/nitrite transporter	K02575	3e-141	499	ppp:PHYPADRAFT_82118	MFS transporter, NNP family, nitrate/nitrite transporter	-	-	-
	Unigene21709_All	1.1156	0.5252	8.8744	8.7866	446	No	402-452		gi|224133630|ref|XP_002321622.1|	74.7	4e-13	high affinity nitrate transporter [Populus trichocarpa] >gi|222868618|gb|EEF05749.1| high affinity nitrate transporter [Populus trichocarpa]	sp|Q9LPV5|NRT25_ARATH	73.2	NRT2	6e-13	High affinity nitrate transporter 2.5 OS=Arabidopsis thaliana GN=NRT2.5 PE=2 SV=1	--	--	--	--	--	K02575	3e-08	55.1	ppp:PHYPADRAFT_82118	MFS transporter, NNP family, nitrate/nitrite transporter	-	-	-
	Unigene31234_All	0.9662	0.2373	40.4287	20.9165	987	No	409-3’		gi|166209891|gb|ABL89187.3|	144	2e-33	high affinity nitrate transporter [Spinacia oleracea]	sp|Q9LPV5|NRT25_ARATH	96.7	NRT2	2e-19	High affinity nitrate transporter 2.5 OS=Arabidopsis thaliana GN=NRT2.5 PE=2 SV=1	--	--	--	--	--	K02575	2e-17	87.8	ppp:PHYPADRAFT_82118	MFS transporter, NNP family, nitrate/nitrite transporter	-	-	-
24	Unigene39295_All	0.6075	1.0011	2.8109	1.9238	273	No	165-252	Unigene39295_All + Unigene80102_All	gi|166209891|gb|ABL89187.3|	140	6e-33	high affinity nitrate transporter [Spinacia oleracea]	sp|Q9LPV5|NRT25_ARATH	118	NRT2	1e-26	High affinity nitrate transporter 2.5 OS=Arabidopsis thaliana GN=NRT2.5 PE=2 SV=1	RSp1223	76.6	1e-14	COG2223	Nitrate/nitrite transporter	K02575	1e-21	98.6	ppp:PHYPADRAFT_82118	MFS transporter, NNP family, nitrate/nitrite transporter	GO:0006810//transport	-	GO:0016020//membrane
	Unigene80102_All	0.765	1.2966	2.6826	1.3417	271	No	381-413		gi|15222118|ref|NP_172754.1|	50.4	7e-06	nitrate transporter2.5 [Arabidopsis thaliana] >gi|75264143|sp|Q9LPV5.1|NRT25_ARATH RecName: Full=High affinity nitrate transporter 2.5; Short=AtNRT2:5 >gi|8698741|gb|AAF78499.1|AC012187_19 Strong similarity to high-affinity nitrate transporter ACH2 from Arabidopsis thaliana gb|AF019749 >gi|332190831|gb|AEE28952.1| nitrate transporter2.5 [Arabidopsis thaliana]	sp|Q9LPV5|NRT25_ARATH	50.4	NRT2	3e-06	High affinity nitrate transporter 2.5 OS=Arabidopsis thaliana GN=NRT2.5 PE=2 SV=1	--	--	--	--	--	K02575	2e-06	48.1	ppp:PHYPADRAFT_82118	MFS transporter, NNP family, nitrate/nitrite transporter	-	-	-
25	Unigene136150_All	0	0	0.9756	2.1469	207	No	5'-66	Unigene136150_All + Unigene132777_All	gi|15222118|ref|NP_172754.1|	86.3	1e-16	nitrate transporter2.5 [Arabidopsis thaliana] >gi|75264143|sp|Q9LPV5.1|NRT25_ARATH RecName: Full=High affinity nitrate transporter 2.5; Short=AtNRT2:5 >gi|8698741|gb|AAF78499.1|AC012187_19 Strong similarity to high-affinity nitrate transporter ACH2 from Arabidopsis thaliana gb|AF019749 >gi|332190831|gb|AEE28952.1| nitrate transporter2.5 [Arabidopsis thaliana]	sp|Q9LPV5|NRT25_ARATH	86.3	NRT2	6e-17	High affinity nitrate transporter 2.5 OS=Arabidopsis thaliana GN=NRT2.5 PE=2 SV=1	RSp1223	48.1	4e-06	COG2223	Nitrate/nitrite transporter	K02575	9e-14	72.4	ppp:PHYPADRAFT_82118	MFS transporter, NNP family, nitrate/nitrite transporter	-	-	-
	Unigene132777_All	0	0	0.8852	2.5458	365	No	402-3'		gi|224133630|ref|XP_002321622.1|	74.7	3e-13	high affinity nitrate transporter [Populus trichocarpa] >gi|222868618|gb|EEF05749.1| high affinity nitrate transporter [Populus trichocarpa]	sp|Q9LPV5|NRT25_ARATH	73.2	NRT2	5e-13	High affinity nitrate transporter 2.5 OS=Arabidopsis thaliana GN=NRT2.5 PE=2 SV=1	--	--	--	--	--	K02575	2e-08	55.1	ppp:PHYPADRAFT_82118	MFS transporter, NNP family, nitrate/nitrite transporter	GO:0006810//transport	-	GO:0016020//membrane
26	Unigene127917_All	0	0.3366	1.2186	8.0104	232	No	5'-52		gi|297843596|ref|XP_002889679.1|	60.1	9e-09	ATNRT2:1 [Arabidopsis lyrata subsp. lyrata] >gi|297335521|gb|EFH65938.1| ATNRT2:1 [Arabidopsis lyrata subsp. lyrata]	sp|O82811|NRT21_ARATH	60.1	NRT2	4e-09	High-affinity nitrate transporter 2.1 OS=Arabidopsis thaliana GN=NRT2.1 PE=1 SV=1	--	--	--	--	--	K02575	2e-06	48.1	ppp:PHYPADRAFT_82118	MFS transporter, NNP family, nitrate/nitrite transporter	GO:0015698//inorganic anion transport;GO:0010035//response to inorganic substance;GO:0048528//post-embryonic root development	GO:0015103//inorganic anion transmembrane transporter activity	GO:0016020//membrane
	Unigene139223_All	0.4984	0.657	1.4563	2.3308	416	No	19-142		gi|166209891|gb|ABL89187.3|	195	1e-49	high affinity nitrate transporter [Spinacia oleracea]	sp|Q9LPV5|NRT25_ARATH	181	NRT2	2e-45	High affinity nitrate transporter 2.5 OS=Arabidopsis thaliana GN=NRT2.5 PE=2 SV=1	RSp1223	87	9e-18	COG2223	Nitrate/nitrite transporter	K02575	5e-37	150	ppp:PHYPADRAFT_82118	MFS transporter, NNP family, nitrate/nitrite transporter	GO:0006810//transport	-	GO:0016020//membrane
27	Unigene31233_All	1.4512	1.3665	2.0194	4.8481	200	No	384-499		gi|108794607|gb|ABG20828.1|	109	9e-24	high affinity nitrate transporter NRT2.5 [Hordeum vulgare subsp. vulgare]	sp|Q9LPV5|NRT25_ARATH	105	NRT2	1e-22	High affinity nitrate transporter 2.5 OS=Arabidopsis thaliana GN=NRT2.5 PE=2 SV=1	--	--	--	--	--	K02575	4e-19	90.1	ppp:PHYPADRAFT_82118	MFS transporter, NNP family, nitrate/nitrite transporter	-	-	-
	Unigene73057_All	1.3375	0.9895	1.6751	14.0564	434	No	459-3'		gi|166209891|gb|ABL89187.3|	73.9	6e-13	high affinity nitrate transporter [Spinacia oleracea]	--	--	NRT2	--	--	--	--	--	--	--	K02575	1e-06	49.3	ppp:PHYPADRAFT_82118	MFS transporter, NNP family, nitrate/nitrite transporter	GO:0006810//transport	-	-
